# Supplementary material
Source: publisher figshare collection journal article supplement (https://rs.figshare.com/ndownloader/files/16124972)
Supplement: Supplementary file 1 [file 16124972]

**Supplementary Materials**

**Regulatory mechanisms underlying the specification of the pupal-homologous stage in a hemimetabolous insect**

Yoshiyasu Ishimaru1, Sayuri Tomonari2, Takahito Watanabe1, Sumihare Noji1, and Taro Mito1*

1Division of Bioscience and Bioindustry, Graduate School of Technology, Industrial and Social Sciences, Tokushima University, 2-1 Minami-Jyosanjima-cho, Tokushima City, Tokushima 770-8513, Japan

2 Division of Chemical and Physical Analyses, Center for Technical Support, Institute of Technology and Science, Tokushima University, 2-1 Minami-Jyosanjima-cho, Tokushima City, Tokushima 770-8506, Japan

3

*This author is corresponding author.

**Supplementary Figure Legends**

**Figure S1.** **Typical processes of cricket wing and ovipositor development.**

(*a*-*f*) Dorsal views of wild-type wing shapes in sixth (*a*), penultimate (seventh) (*c*) and final (eighth) (*e*) instar nymphs. Wing pads at the sixth instar (*a*) are marked with magenta asterisks. Wing shape of males (left panel: ♂) and females (right panel: ♀). T1–3; thorax 1–3, Ab; abdomen. Ventral views of wild-type ovipositor shapes in sixth (*b*), seventh (*d*) and eighth (*f*) instar nymphs. Scale bar = 2 mm.

**Figure S2. Adult wing phenotypes resulting from the depletion of *Gb*’*Kr-h1* and *Gb*’*Br* with RNAi at the fifth instar.**

(*a*–*d*) dsRNA targeting *DsRed2* (control) or *Gb*’*Kr-h1* was injected into nymphs on day 1 of the fifth instar stage. In panels *a* and *c*, the control adults are on the left side and the RNAi-treated on the right. The RNAi-treated nymphs underwent precocious adult metamorphosis at the seventh instar, and the wings of these adults were significantly smaller than those of control adults (*b*,*d*). (*e*–*h’*) The effect of RNAi targeting *DsRed2* (control) and *Gb*’*Br* on the wing that developed in adults (*e*,*g*). dsRNA targeting *DsRed2* or *Gb*’*Br* was injected into nymphs on day 1 of the fifth instar stage. In panels *e* and *g*, the control adults are on the left side and the RNAi-treated on the right. Wing morphology in the resulting precocious adults was abnormal, with an extended side compared to control adults. Morphological variations were observed in panels *f*, *f’*, *h* and *h’*. The sex of individuals in each slide is shown at the bottom of each slide (male: ♂; and female: ♀). Scale bar = 1 cm in *a*, *c*, *e*–*h’*; 2 mm in *b*, *d*.

**Figure S3. Wing phenotypes obtained from *Gb*’*Kr-h1* and *Gb*’*Br* RNAi nymphs at the third instar.**

(*a*–*c*) Development of the wing pads in sixth instar nymphs following the injection of dsRNA targeting *DsRed2* (control; *a*), *Gb*’*Kr-h1* (*b*) or *Gb*’*Br* (*c*) into the third instar nymphs, as indicated. Wing pads are marked with magenta asterisks. The wing pads of the *Gb*’ *Kr-h1* (*b*) and *Gb*’*Br* (*c*)*-*targeted sixth instar nymphs exhibited abnormal growth, with an extended side, as compared with nymphs that were injected with *DsRed2* dsRNA (*a*). (*d*,*d’*) Precocious adults were produced following the injection of dsRNA targeting *Gb*’*Br*. *Gb*’*Br* dsRNA was injected into third instar nymphs, and the resulting adults after the sixth instar are shown in panels *d* and *d’*. The wings of these adults were significantly reduced (*d*) and wrinkled (*d’*). Scale bar = 2 mm in *a*–*c*; 1 cm in *d*, *d’*.


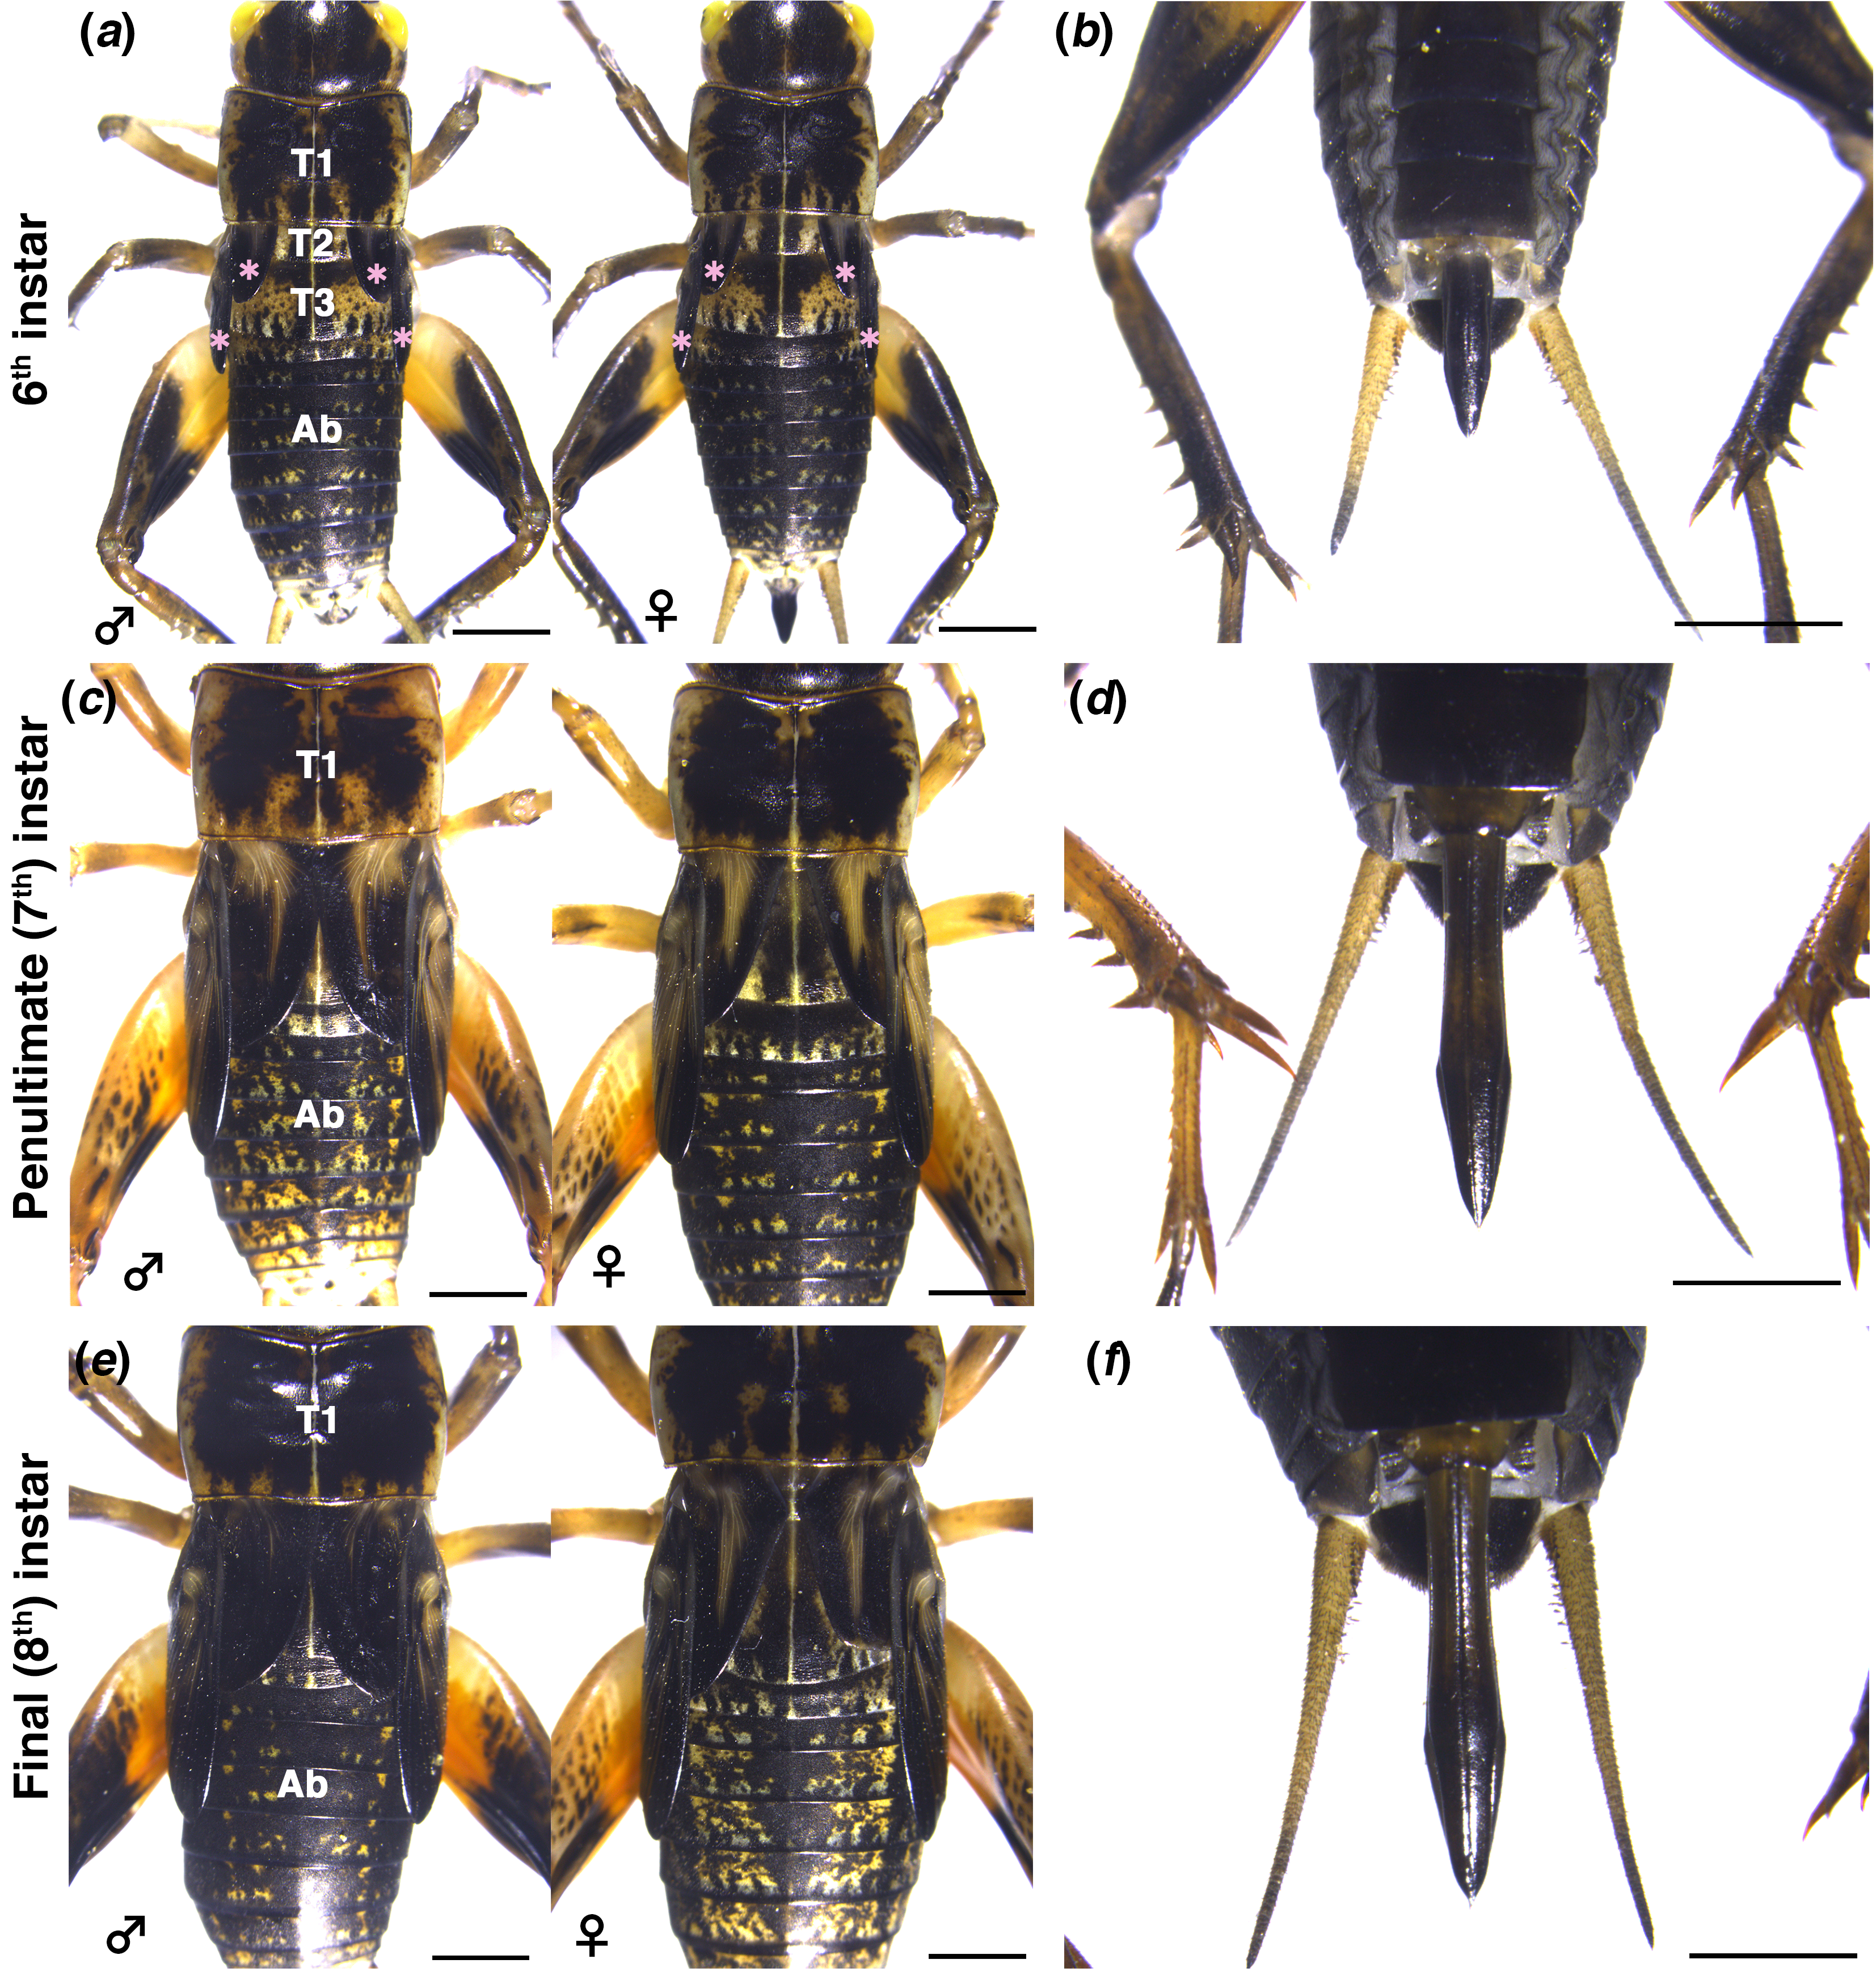


Figure S1


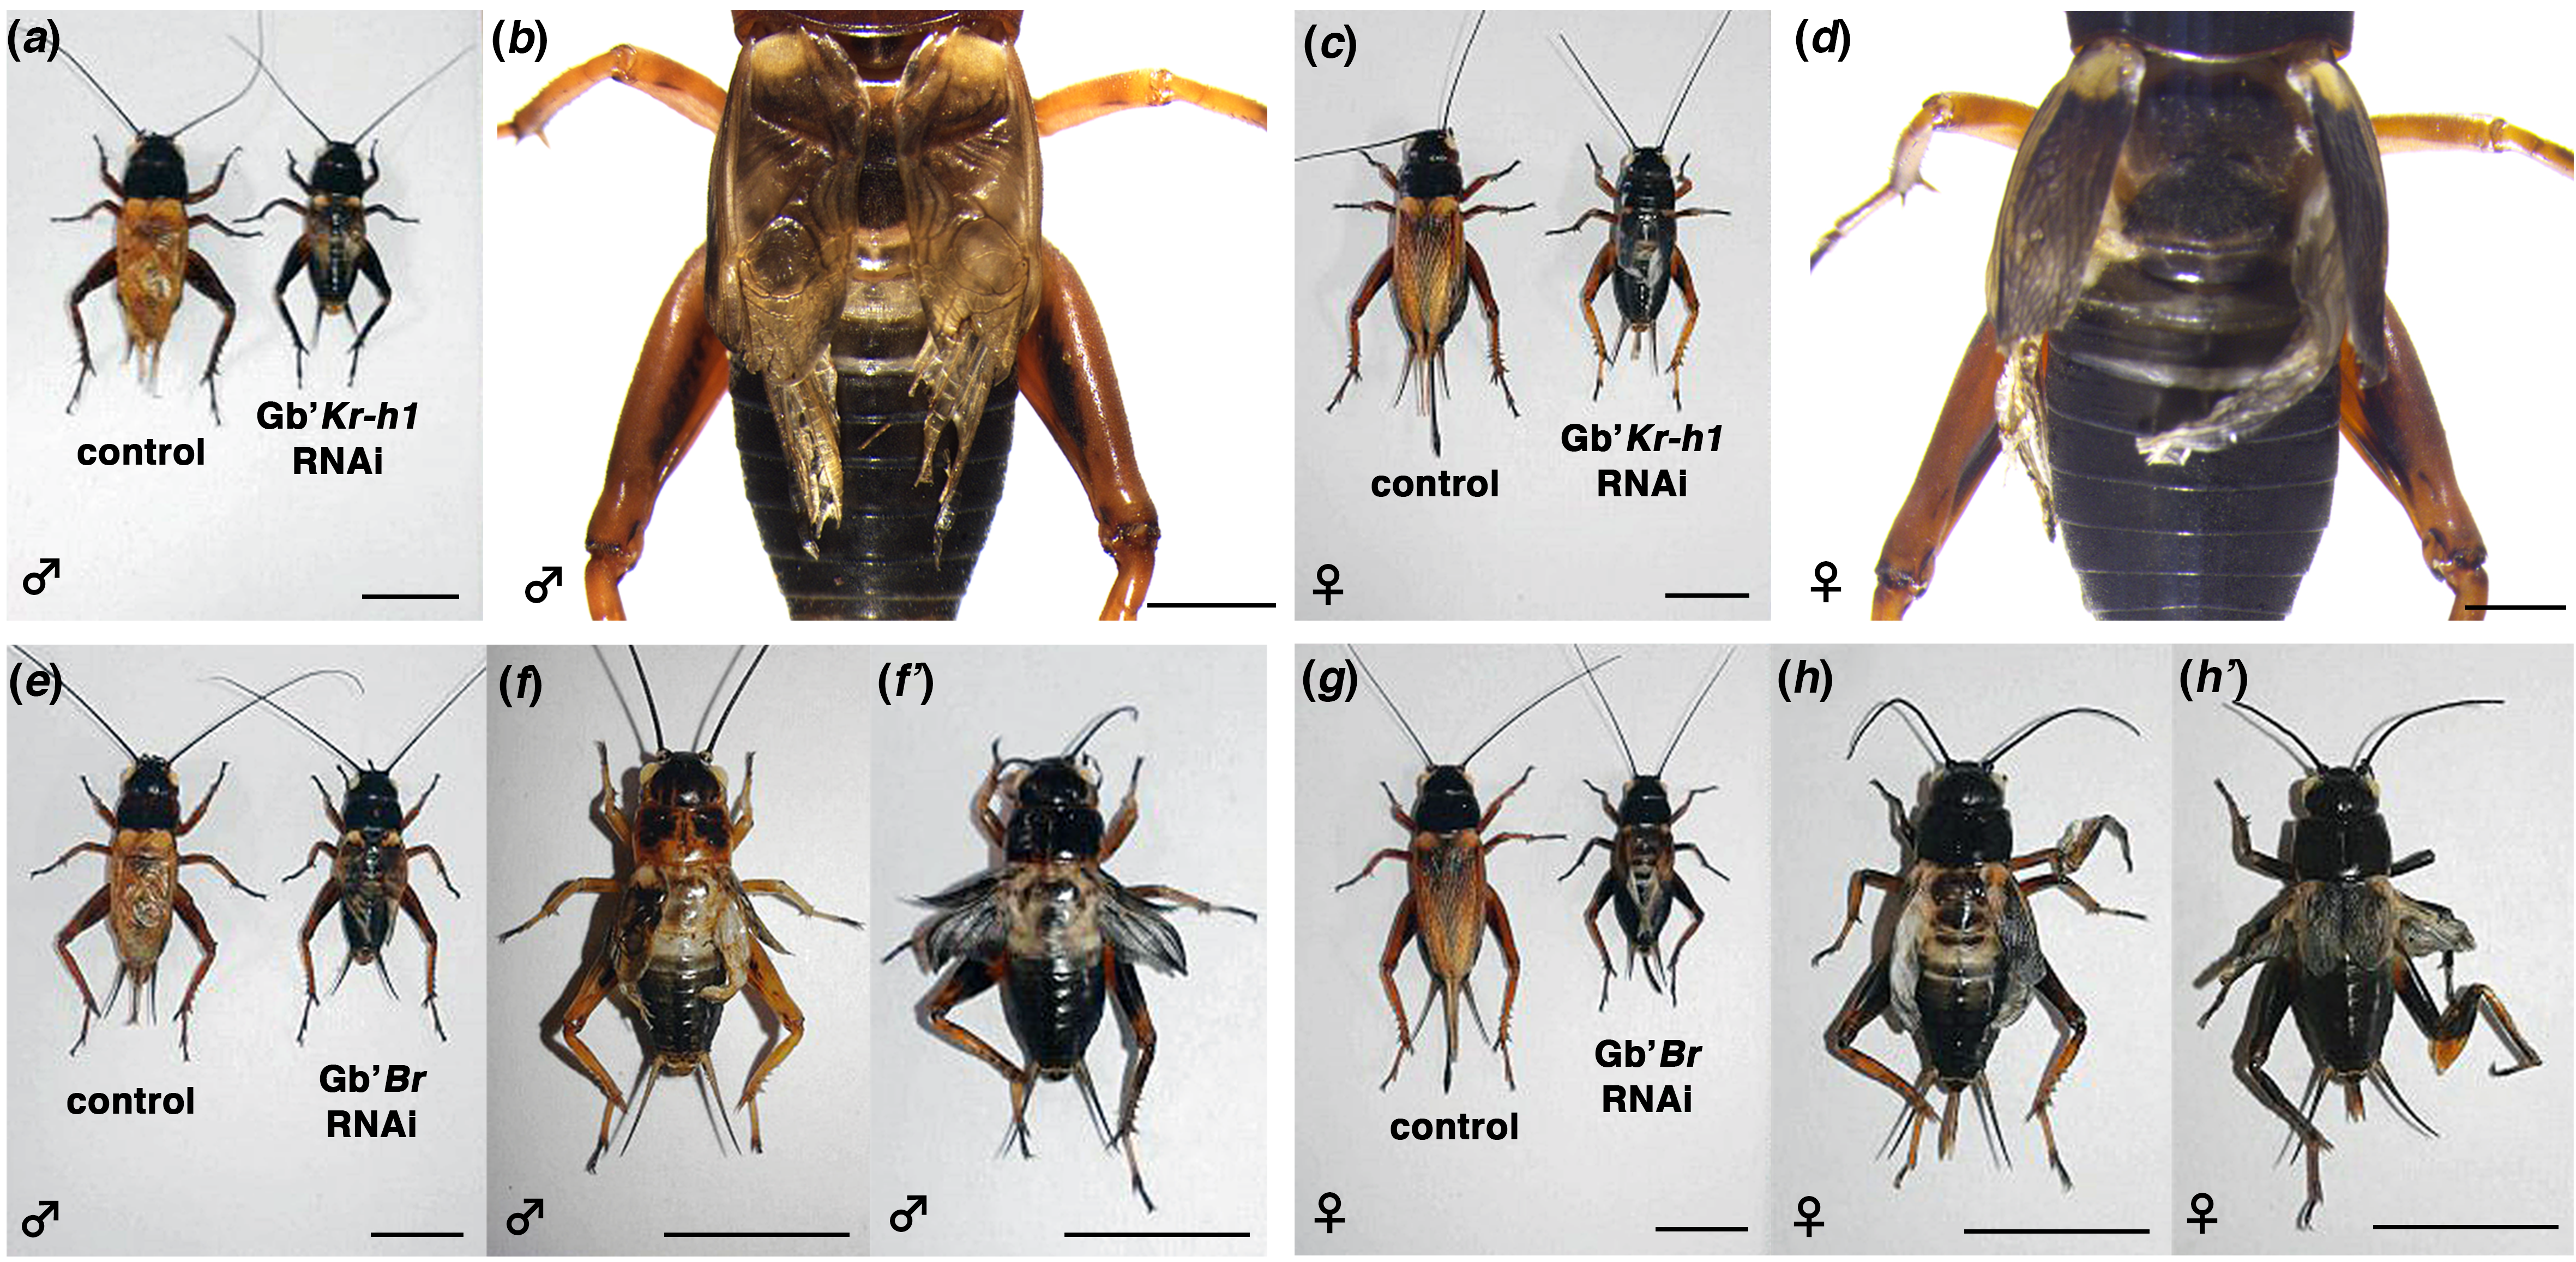


Figure S2


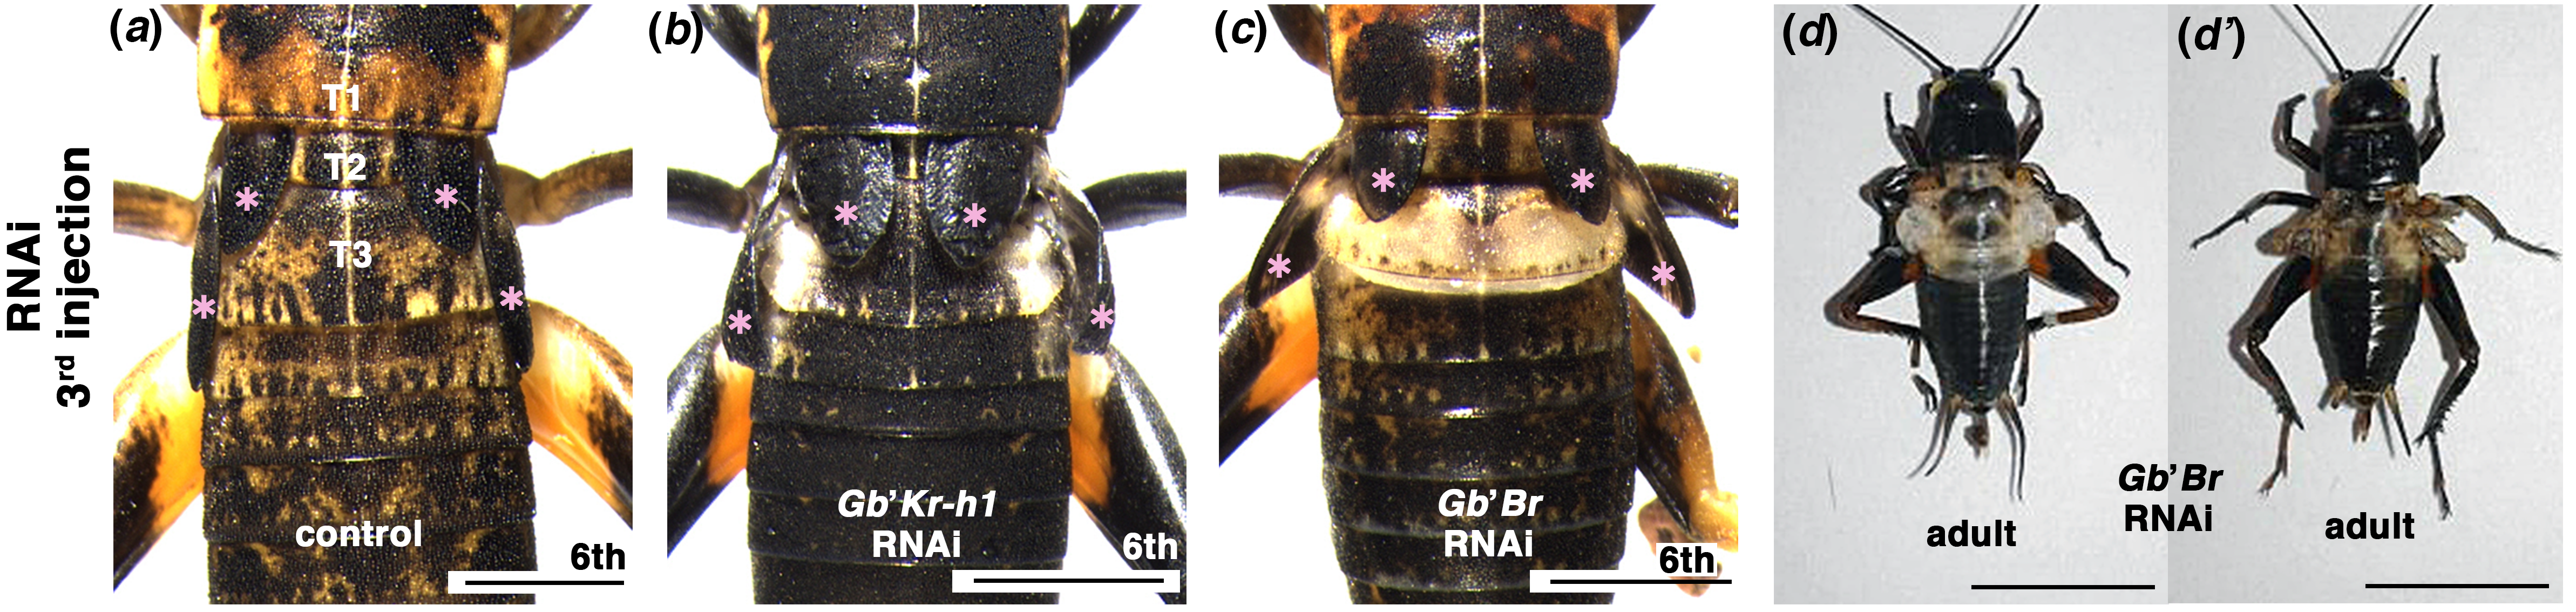


Figure S3

**Supplementary Tables**

**Table S1.** Phenotypes of *G*. *bimaculatus* injected with *Gb*’*Kr-h1* and *Gb*’*Br* at the fifth instar.


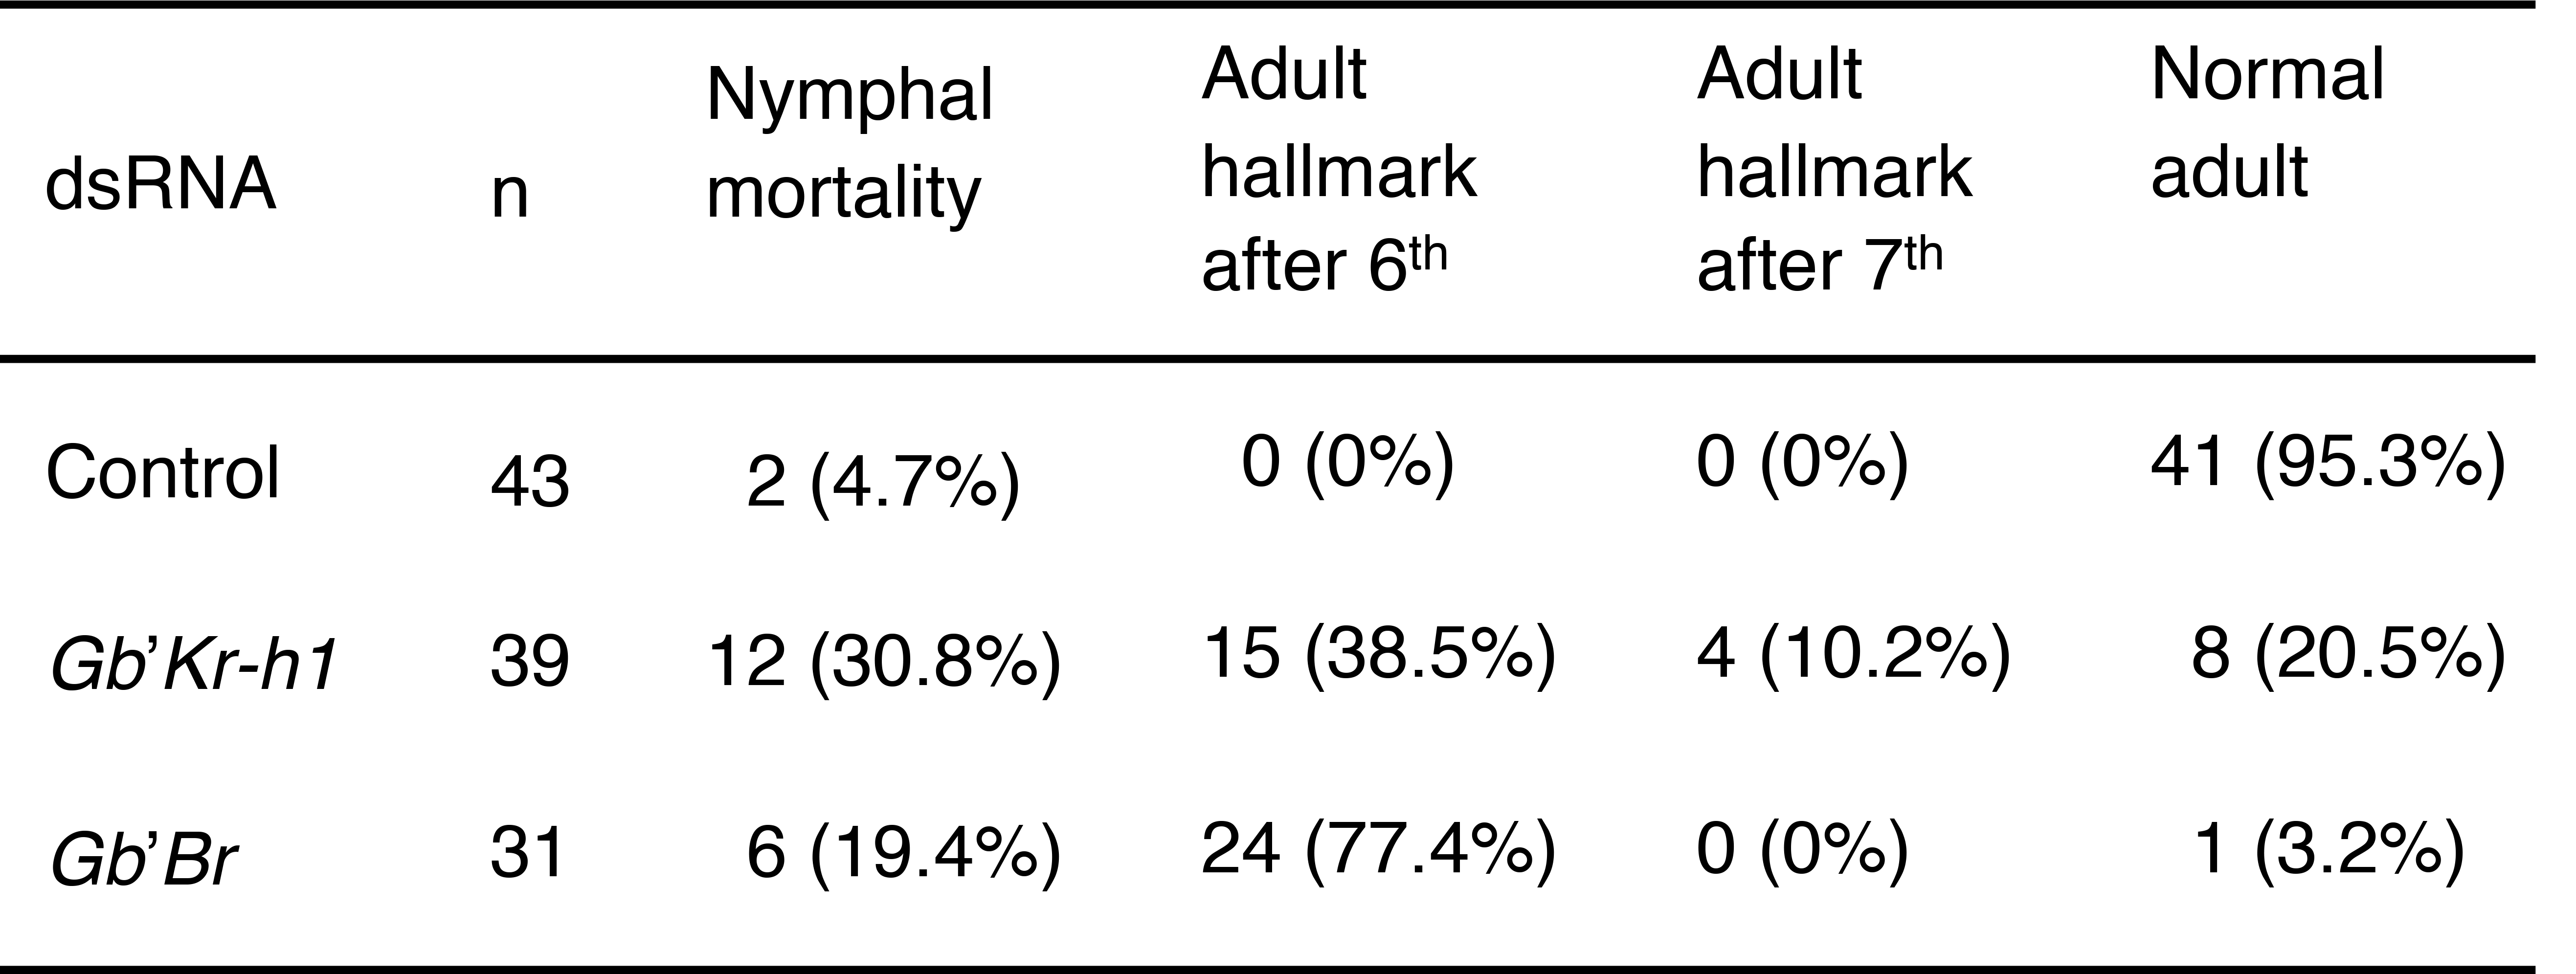


dsRNAs were injected at the fifth instar.

Adult hallmark denotes incidence of precocious adult metamorphosis at the sixth or seventh instar.

**Table S2.** Phenotypes of *G*. *bimaculatus* injected with *Gb*’*E93* at the fifth instar.


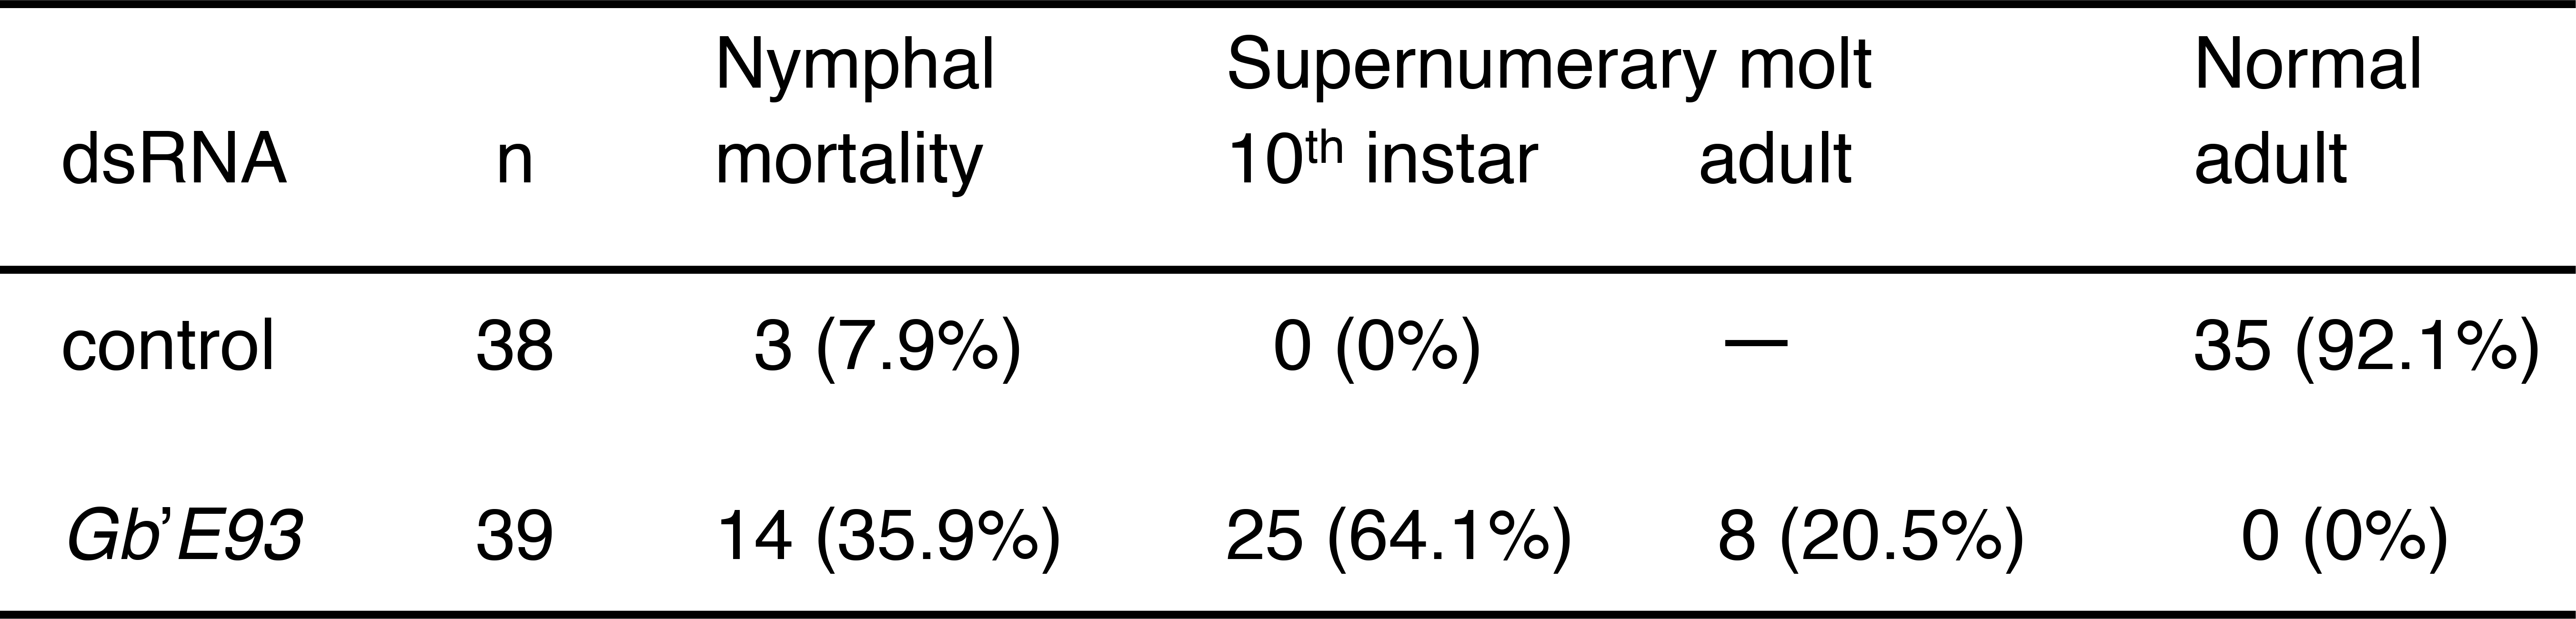


dsRNAs were injected at the fifth instar.

Supernumerary moults occurred at the tenth instar, which underwent additional nymphal moults after the eighth instar, and a subsequent adult moult.

**Table S3.** Primer sequences used for cloning by RT-PCR.

| **Primer Name** | **Primer sequence** |
| --- | --- |
| *Gb*’*Kr-h1* Fw | 5'-TCGGTGAAGGAGAACCTGTC-3' |
| *Gb*’*Kr-h1* Rv | 5'-GGTTGTAGCCGAAGCTCTTG-3' |
| *Gb*’*Br* Fw | 5'-AAATTTGCGGGATGATGAAG-3' |
| *Gb*’*Br* Rv | 5'-gtcgcaagatgtccttggat-3' |
| *Gb*’*E93* Fw | 5'-CGCAGGCAATACACTGAAGA-3' |
| *Gb*’*E93* Rv | 5'-TACAGCGCGAACTGCTTCTA-3' |

**Table S4.** Primer sequences for the template fragment cloning of dsRNA synthesis.

| **Primer Name** | **Primer sequence** |
| --- | --- |
| *Gb*’*Br* Fw2 | 5'-CTCATCACCCAGTCCAACCT-3' |
| *Gb*’*Br* Rv | 5'-gtcgcaagatgtccttggat-3' |
| *Gb*’*E93* Fw2 | 5'-AGTTGTGGCCCTGAAAGATG-3' |
| *Gb*’*E93* Rv2 | 5'-CGAACGAGTTCTGGAAGGAG-3' |

**Table S5.** Primers used for qPCR.

| **Primer Name** | **Primer sequence** |
| --- | --- |
| *Gb*’*Kr-h1* qPCRFw | 5'-ATTCACGTGCTCCAAGCAG-3' |
| *Gb*’*Kr-h1* qPCRRv | 5'-GTTGTAGCCGAAGCTCTTGC-3' |
| *Gb*’*Br* qPCRFw | 5'-AGCATTTTTGTCTCCGTTGG-3' |
| *Gb*’*Br* qPCRRv | 5'-CAAGCTTCTTCCTTCACAAGC-3' |
| *Gb*’*E93* qPCRFw | 5'-CGCAGGCAATACACTGAAGA-3' |
| *Gb*’*E93* qPCRRv | 5'-GGATGCCGTAGATGACTGCT-3' |
| *Gb*’*actin* qPCRFw | 5'-TTGACAATGGATCCGGAATGT-3' |
| *Gb*’*actin* qPCRRv | 5'-AAAACTGCCCTGGGTGCAT-3' |
